# Supplementary material for: High Proportion of Potential Candidates for Immunotherapy in a Chilean Cohort of Gastric Cancer Patients: Results of the FORCE1 Study
Source: MDPI journal article supplement (doi:10.3390/cancers11091275), 2019-08-30

# High Proportion of Potential Candidates for Immunotherapy in a Chilean Cohort of Gastric Cancer Patients: Results of the FORCE1 Study

Miguel Cordova-Delgado, Mauricio P. Pinto, Ignacio N. Retamal, Matías Muñoz-Medel, María Loreto Bravo, Mariía F. Fernández, Betzabé Cisternas, Sebastian Mondaca, Cesar Sanchez, Hector Galindo, Bruno Nervi, Carolina Ibáñez, Francisco Acevedo, Jorge Madrid, José Peña, Erica Koch, Maria José Maturana, Diego Romero, Nathaly de la Jara, Javiera Torres, Manuel Espinoza, Carlos Balmaceda, Yuwei Liao, Zhiguang Li, Matías Freire, Valentina Gárate-Calderón, Javier Caceres, Gonzalo Sepúlveda-Hermosilla, Rodrigo Lizana, Liliana Ramos, Rocío Artigas, Enrique Norero, Fernando Crovari, Ricardo Armisen, Alejandro H. Corvalán, Gareth I. Owen and Marcelo Garrido

**Table S1.** Demographic and clinico-pathological characteristics of HER2+ subgroup ( $n = 12$ ), EBV+ subgroup ( $n = 12$ ), PDL1+ subgroup ( $n = 26$ ) and MSI+ subgroup ( $n = 13$ ) populations.

| Characteristic                                 | HER2+<br>$n$ (%)     | EBV+<br>$n$ (%)      | PDL1+<br>$n$ (%)     | MSI+<br>$n$ (%)      |
|------------------------------------------------|----------------------|----------------------|----------------------|----------------------|
| $n$                                            | 12                   | 12                   | 26                   | 13                   |
| <b>Gender</b>                                  |                      |                      |                      |                      |
| Male                                           | 7 (58.3)             | 11 (91.7)            | 21 (80.8)            | 7 (53.8)             |
| Female                                         | 5 (41.7)             | 1 (8.3)              | 5 (19.2)             | 6 (46.2)             |
| <b>Stage at diagnosis</b>                      |                      |                      |                      |                      |
| I                                              | 2 (16.7)             | 1 (8.3)              | 3 (11.5)             | 2 (15.4)             |
| II                                             | 3 (25.0)             | 5 (41.7)             | 9 (34.6)             | 6 (46.2)             |
| III                                            | 6 (50.0)             | 4 (33.3)             | 12 (46.2)            | 4 (30.8)             |
| IV                                             | 1 (8.3)              | 2 (16.7)             | 2 (7.7)              | 1 (7.7)              |
| <b>Location of primary tumor</b>               |                      |                      |                      |                      |
| Distal esophagus and GEJ                       | 3 (25.0)             | 6 (50.0)             | 7 (26.9)             | 1 (7.7)              |
| Fundus                                         | 0                    | 3 (25.0)             | 3 (11.5)             | 0                    |
| Corpus                                         | 4 (33.3)             | 2 (16.7)             | 8 (30.8)             | 3 (23.0)             |
| Antrum                                         | 1 (8.3)              | 1 (8.3)              | 7 (26.9)             | 7 (53.8)             |
| Pylorus                                        | 1 (8.3)              | 0                    | 0                    | 1 (7.7)              |
| Multiple                                       | 2 (16.7)             | 0                    | 1 (3.9)              | 1 (7.7)              |
| NA                                             | 1 (8.3)              | 0                    | 0                    | 0                    |
| <b>Lauren histological type</b>                |                      |                      |                      |                      |
| Intestinal                                     | 8 (66.7)             | 4 (33.3)             | 6 (23.1)             | 3 (23.0)             |
| Diffuse                                        | 2 (16.7)             | 2 (16.7)             | 9 (34.6)             | 6 (46.2)             |
| Mixed                                          | 1 (8.3)              | 1 (8.3)              | 3 (11.5)             | 2 (15.4)             |
| NA                                             | 1 (8.3)              | 5 (41.7)             | 8 (30.8)             | 2 (15.4)             |
| <b>WHO histological type</b>                   |                      |                      |                      |                      |
| Adenocarcinoma                                 | 10 (83.3)            | 9 (75.0)             | 21 (80.8)            | 12 (92.3)            |
| Undifferentiated carcinoma                     | 0                    | 2 (16.7)             | 1 (3.9)              | 1 (7.7)              |
| Adenosquamous cell carcinoma                   | 0                    | 0                    | 1 (3.9)              | 0                    |
| NA                                             | 2 (16.7)             | 1 (8.3)              | 3 (11.5)             | 0                    |
| <b>Signet-ring cell presence</b>               |                      |                      |                      |                      |
| No                                             | 6 (50.0)             | 11 (91.7)            | 21 (80.8)            | 6 (46.2)             |
| Yes                                            | 5 (41.7)             | 0                    | 4 (15.4)             | 5 (38.5)             |
| NA                                             | 1 (8.3)              | 1 (8.3)              | 1 (3.9)              | 2 (15.4)             |
| <b>Median/average age at diagnosis (years)</b> | 62.5/60.3<br>(39–83) | 57.0/57.7<br>(36–75) | 59.0/61.3<br>(33–84) | 66.0/65.0<br>(26–82) |
| <b>Median overall survival (months)</b>        | 30                   | NR                   | 66                   | NR                   |

GEJ Gastroesophagic junction, NA Not available, NR Not reached.

**Table S2.** Driver mutations affecting FORCE1 patients.

| <b>Gene</b>   | <b>Driver Mutation <sup>a</sup></b> | <b>Affected Patients (n)</b> |
|---------------|-------------------------------------|------------------------------|
| <i>BRAF</i>   | p.D594G                             | 3                            |
| <i>CTNNB1</i> | p.D32Y                              | 1                            |
| <i>FBXW7</i>  | p.R465H                             | 1                            |
| <i>KRAS</i>   | p.G13D                              | 1                            |
| <i>NRAS</i>   | p.G12D                              | 2                            |
| <i>PIK3CA</i> | p.E545K                             | 2                            |
| <i>RHOA</i>   | p.Y42C                              | 3                            |
| <i>TP53</i>   | p.R175H                             | 2                            |
|               | p.R181C                             | 1                            |
|               | p.R248Q                             | 2                            |
|               | p.R248W                             | 2                            |
|               | p.R273C                             | 4                            |
|               | p.R273H                             | 1                            |
|               | p.R282W                             | 1                            |
|               | p.C135Y                             | 1                            |
|               | p.C176F                             | 1                            |
|               | p.Q144H                             | 1                            |
|               | p.P152L                             | 1                            |
|               | p.Y205S                             | 1                            |
|               | p.Y220H                             | 2                            |
|               | p.V173L                             | 1                            |
|               | p.V272M                             | 1                            |

<sup>a</sup> Driver mutations identified using sequence-based and structure-based approaches.

**Table S3.** Actionable mutations affecting FORCE1 patients.

| Gene          | Druggable Mutation  | Drug Associate                          | Level of Evidence <sup>a</sup> | Cancer Type      | Affected Patients (N) |
|---------------|---------------------|-----------------------------------------|--------------------------------|------------------|-----------------------|
| <i>ALK</i>    | Fusion              | Crizotinib, Alectinib, Ceritinib        | 1                              | NSC Lung         | 4                     |
| <i>ATM</i>    | p.S2017fs           |                                         |                                |                  | 1                     |
| <i>ATM</i>    | p.L581fs            | Olaparib                                | 4                              | All solid tumors | 1                     |
| <i>ATM</i>    | p.D2725fs           |                                         |                                |                  | 1                     |
| <i>BRAF</i>   | p.D594G             | PLX8394                                 | 4                              | All tumors       | 3                     |
| <i>BRCA1</i>  | Fusion              | Cobimetinib, Trametinib                 | 3A                             | Melanoma         | 1                     |
| <i>BRCA1</i>  | p.Q1111fs           | Rucaparib, Niraparib                    | 1                              | Ovarian          | 1                     |
| <i>BRCA2</i>  | p.E2258*            | Talazoparib, Olaparib                   | 2A                             | Breast/Ovarian   | 1                     |
| <i>BRCA2</i>  | Deletion (CNV)      |                                         |                                |                  | 2                     |
| <i>CDKN2A</i> | p.R131C             | Abemaciclib, Palbociclib,               |                                |                  | 1                     |
| <i>CDKN2A</i> | p.R87Q              | Ribociclib                              | 4                              | All solid tumors | 1                     |
| <i>CDKN2A</i> | p.Q50*              |                                         |                                |                  | 1                     |
| <i>ERBB2</i>  | Amplification (CNV) | Trastuzumab                             | 1                              | Esophagogastric  | 3                     |
| <i>ERBB2</i>  | p.R678Q             | Neratinib                               | 3A                             | Breast           | 2                     |
| <i>FGFR2</i>  | p.P253R             | AZD4547, BGJ398, Erdafitinib, Debio1347 | 4                              | All solid tumors | 1                     |
| <i>HRAS</i>   | p.G12D              | Tipifarnib                              | 3A                             | Head and Neck    | 1                     |
| <i>HRAS</i>   | p.Q61H              | Panitumumab, Cetuximab                  | R1                             | Colorectal       | 1                     |
| <i>KRAS</i>   | p.G12A              |                                         |                                |                  | 1                     |
| <i>KRAS</i>   | p.G12D              | Cobimetinib, Binimetinib, Trametinib    | 4                              | All tumors       | 3                     |
| <i>KRAS</i>   | p.G13D              |                                         |                                |                  | 1                     |
| <i>KRAS</i>   | p.G12D              | Panitumumab, Cetuximab                  | R1                             | Colorectal       | 1                     |
| <i>NRAS</i>   | p.G12D              | Binimetinib, Binimetinib + Ribociclib   | 3A                             | Melanoma         | 1                     |
| <i>NRAS</i>   | p.E542K             |                                         |                                |                  | 4                     |
| <i>NRAS</i>   | p.K111E             |                                         |                                |                  | 1                     |
| <i>NRAS</i>   | p.G118D             | Buparlisib, Alpelisib,                  |                                |                  | 1                     |
| <i>PIK3CA</i> | p.T1025A            | Fulvestrant, Serabelisib,               | 3A                             | Breast           | 2                     |
| <i>PIK3CA</i> | p.H1047R            | Copanlisib, GDC-0077, Taselisib         |                                |                  | 1                     |
| <i>PIK3CA</i> | p.E545G             |                                         |                                |                  | 3                     |
| <i>PIK3CA</i> | p.R88Q              |                                         |                                |                  | 2                     |
| <i>PIK3CA</i> | p.T319fs            |                                         |                                |                  | 1                     |
| <i>PTEN</i>   | p.T167fs            | GSK2636771, AZD8186                     | 4                              | All tumors       | 1                     |
| <i>PTEN</i>   | p.R335*             |                                         |                                |                  | 1                     |
| <i>PTEN</i>   | p.R173H             |                                         |                                |                  | 1                     |
| <i>ROS1</i>   | Fusion              | Crizotinib                              | 1                              | NSC Lung         | 1                     |

<sup>a</sup> Downloaded from OncoKB database *NSC* Non-Small cell, *CNV* Copy number variation.

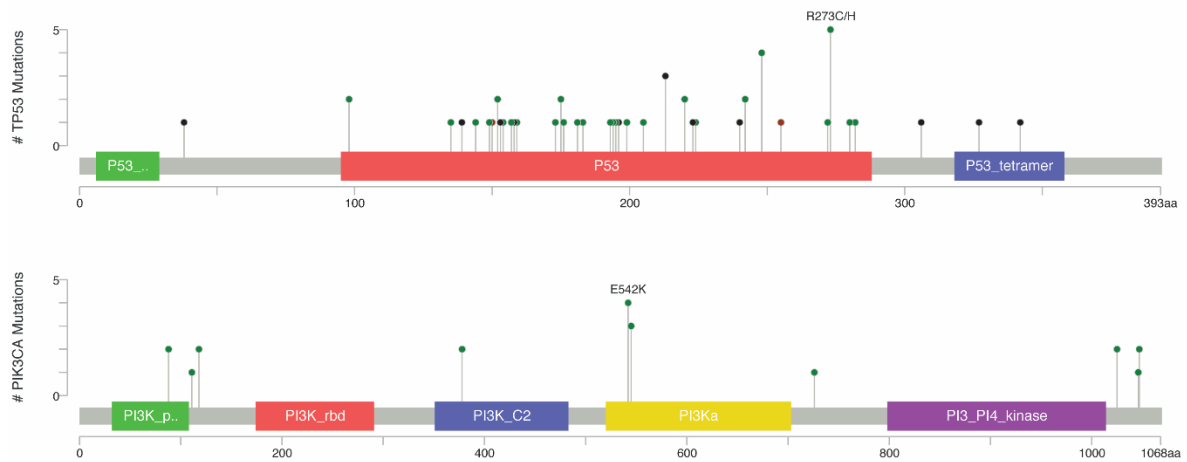

**Figure S1.** Lollipop diagram showing *TP53* and *PIK3CA* gene mutations found in the GCTF.

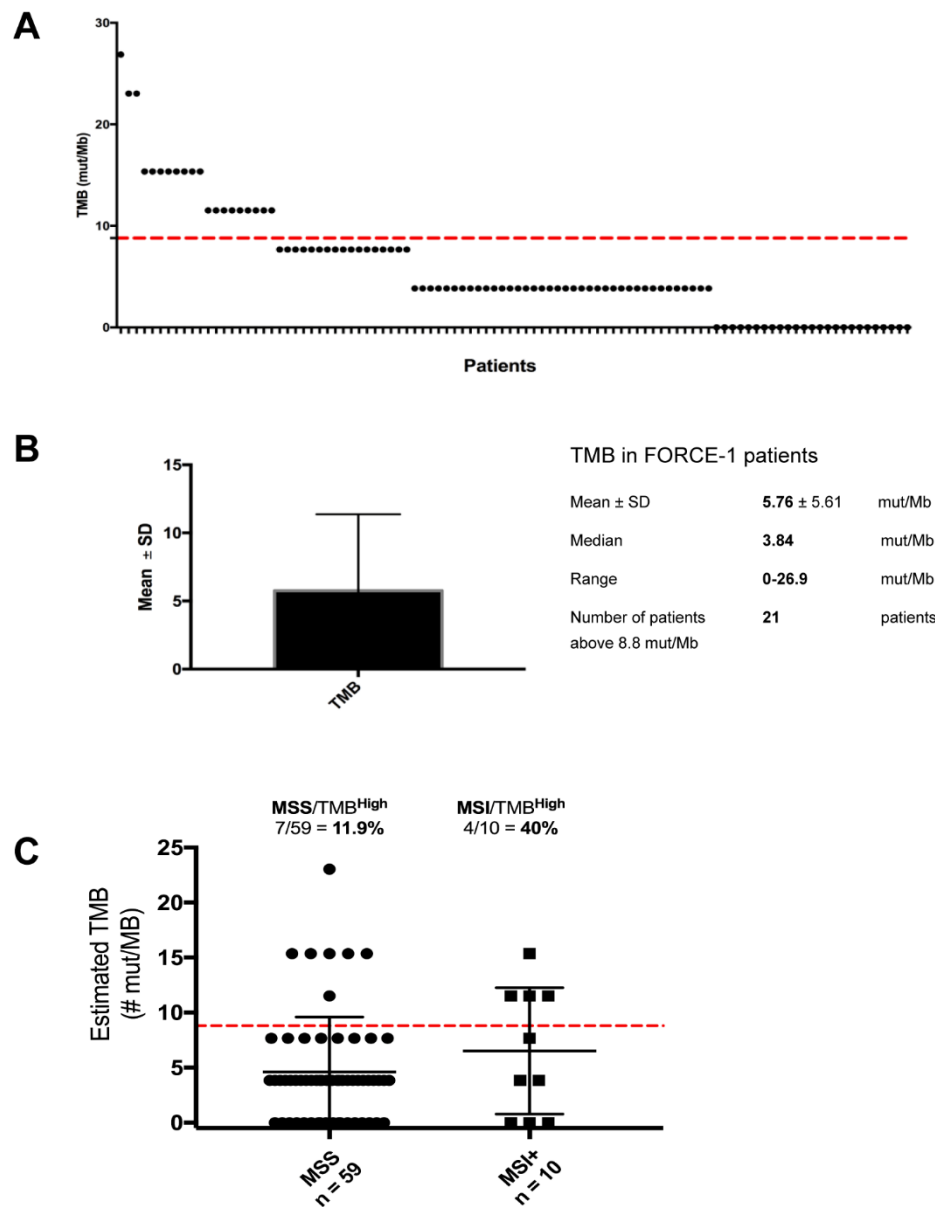

**Figure S2.** Estimated TMB and TMB levels in MSI+ or MSS patients.

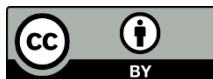

Supplement: s1 [file s1]
